# Supplementary material for: The Impact of Local Genome Sequence on Defining Heterochromatin Domains
Source: PubMed Central journal article supplement (PMC2659443; doi:10.1371/journal.pgen.1000453), 2009-04-10
Supplement: pgen.1000453.s007.pdf [file pgen.1000453.s007.pdf]

**Table S1**

| <b>Strain</b> | <b>Genotype</b>                                            | <b>Source</b>        |
|---------------|------------------------------------------------------------|----------------------|
| Kfy1          | h- ura4D18                                                 | R. Allshire (FY106)  |
| Kfy2          | h- ade6-210                                                | R. Allshire (FY92)   |
| Kfy3          | h+ ura4D18 ade6-210 leu1-32 arg3D his3D                    | R. Allshire (FY1645) |
| Kfy4          | h- ura4D18 ade6-210 leu1-32 arg3D his3D                    | R. Allshire (FY1646) |
| Kfy450        | h+ ade6DN/N leu1-32 ura4D18 his3D arg3D                    | R. Allshire (FY3749) |
| Kfy687        | swi6+333 (leu2+) KΔ::ura4+ leu1-32 ura4DS/E his2 ade6-210  | S. Grewal (SPG1232)  |
| Kfy501        | h+ ade6DN/N his3D leu1-32 arg3D                            | This Study           |
| Kfy616        | h+ ura4::ade6 ade6DN/N his3D leu1-32 arg3D                 | This Study           |
| Kfy617        | h+ ura4::ade6 ade6DN/N his3D leu1-32 arg3D                 | This Study           |
| Kfy618        | h+ ura4::ade6 ade6DN/N his3D leu1-32 arg3D                 | This Study           |
| Kfy619        | h+ ura4::ade6 ade6DN/N his3D leu1-32 arg3D                 | This Study           |
| Kfy620        | h+ ura4::L5-ade6 ade6DN/N his3D leu1-32 arg3D              | This Study           |
| Kfy621        | h+ ura4::L5-ade6 ade6DN/N his3D leu1-32 arg3D              | This Study           |
| Kfy622        | h+ ura4::L5-ade6 ade6DN/N his3D leu1-32 arg3D              | This Study           |
| Kfy623        | h+ ura4::L5-ade6 ade6DN/N his3D leu1-32 arg3D              | This Study           |
| Kfy812        | spbc2f12.03::ura4::L5-ade6 ade6DN/N his3D leu1-32          | This Study           |
| Kfy847        | swi6+333 (leu2) ura4::L5-ade6 ade6DN/N his3D leu1-32 arg3D | This Study           |
| Kfy901        | swi6+333 (leu2) ura4::L5-ade6 ade6DN/N his3D leu1-32 arg3D | This Study           |
| Kfy902        | swi6+333 (leu2) ura4::L5-ade6 ade6DN/N his3D leu1-32 arg3D | This Study           |
| Kfy937        | ura4::5kbPombe-ade6 ade6DN/N his3D leu1-32 arg3D           | This Study           |
| Kfy1011       | ura4::5kbPombe-ade6 ade6DN/N his3D leu1-32 arg3D           | This Study           |
| Kfy1044       | ura4::5kbPombe-ade6 ade6DN/N his3D leu1-32 arg3D           | This Study           |
| Kfy1012       | ura4::L5-5kbPombe-ade6 ade6DN/N his3D leu1-32 arg3D        | This Study           |
| Kfy1013       | ura4::L5-5kbPombe-ade6 ade6DN/N his3D leu1-32 arg3D        | This Study           |
| Kfy1014       | ura4::L5-5kbPombe-ade6 ade6DN/N his3D leu1-32 arg3D        | This Study           |
| Kfy935        | ura4::7kb-ade6 ade6DN/N his3D leu1-32 arg3D                | This Study           |
| Kfy991        | ura4::7kb-ade6 ade6DN/N his3D leu1-32 arg3D                | This Study           |
| Kfy992        | ura4::7kb-ade6 ade6DN/N his3D leu1-32 arg3D                | This Study           |
| Kfy641        | ura4::L5-7kb-ade6 ade6DN/N his3D leu1-32 arg3D             | This Study           |
| Kfy644        | ura4::L5-7kb-ade6 ade6DN/N his3D leu1-32 arg3D             | This Study           |
| Kfy647        | ura4::L5-7kb-ade6 ade6DN/N his3D leu1-32 arg3D             | This Study           |
| Kfy724        | h+ ura4::2xL5-ade6 ade6DN/N his3D leu1-32 arg3D            | This Study           |
| Kfy725        | h+ ura4::2xL5-ade6 ade6DN/N his3D leu1-32 arg3D            | This Study           |
| Kfy726        | h+ ura4::2xL5-ade6 ade6DN/N his3D leu1-32 arg3D            | This Study           |
| Kfy1130       | ura4::L5-7kb::(P3nmt1-his3)-ade6 ade6DN/N his3D leu1-32    | This Study           |
| Kfy1132       | ura4::L5-7kb::(P3nmt1-his3)-ade6 ade6DN/N his3D leu1-32    | This Study           |
| Kfy1133       | ura4::L5-7kb::(P3nmt1-his3)-ade6 ade6DN/N his3D leu1-32    | This Study           |
| Kfy1137       | ura4::L5-7kb::(P41nmt1-his3)-ade6 ade6DN/N his3D leu1-32   | This Study           |
| Kfy1140       | ura4::L5-7kb::(P41nmt1-his3)-ade6 ade6DN/N his3D leu1-32   | This Study           |
| Kfy1141       | ura4::L5-7kb::(P41nmt1-his3)-ade6 ade6DN/N his3D leu1-32   | This Study           |
