# Supplementary material for: The Impact of Local Genome Sequence on Defining Heterochromatin Domains
Source: PubMed Central journal article supplement (PMC2659443; doi:10.1371/journal.pgen.1000453), 2009-04-10
Supplement: pgen.1000453.s008.pdf [file pgen.1000453.s008.pdf]

**Table S2**

| <b>Oligo</b> | <b>Sequence</b>                                                | <b>Purpose</b>                        |
|--------------|----------------------------------------------------------------|---------------------------------------|
| E367         | CCATAAAGATGCAAAGTTGCACC                                        | iPCR                                  |
| BWP32F       | TTCTACTGCCATCAAAGCA                                            | iPCR                                  |
| BWP34F       | gatatcaggcctactagtgcacatcgcgatagatct<br>TCAACTTGGTGGTGAGGTAACG | Construction of BW5                   |
| BWP34Rb      | aggcctcccgggagctcCAGCACATTATTCGGGGGG                           | Construction of BW5                   |
| BWP37F       | TGATATGAGCCCAAGAAGCA                                           | iPCR                                  |
| BWP38F       | CCCTACATGGAATGGAATCG                                           | <i>his3<sup>+</sup></i> qRT-PCR       |
| BWP38R       | GCAAACAGCAAGGTTTGGAT                                           | <i>his3<sup>+</sup></i> qRT-PCR       |
| BWP41F       | TTTACCAAGGCCTTTGATGC                                           | <i>pmp20<sup>+</sup></i> qRT-PCR      |
| BWP41R       | CCTTGTCAGCGGAGGAAATA                                           | <i>pmp20<sup>+</sup></i> qRT-PCR      |
| BWP45F       | TTCAACGAGACATGCGAAAC                                           | <i>mug135<sup>+</sup></i> qRT-PCR     |
| BWP45R       | TCGAGGCAAATTAGGGTCAG                                           | <i>mug135<sup>+</sup></i> qRT-PCR     |
| BWP50F       | TGGCCTGAATATGTTAATGAGAGA                                       | 7.2kb lambda ChIP                     |
| BWP50R       | GCAATAGCTGATAATCGATGCAC                                        | 7.2kb lambda ChIP                     |
| BWP51F       | TACGTTGCAGGTTGCTTTCA                                           | 7.2kb lambda ChIP                     |
| BWP51R       | TTAACCGCCCTATTCTCTCG                                           | 7.2kb lambda ChIP                     |
| BWP53F       | TTACTATGTAAACACCAGGCATGA                                       | 7.2kb lambda ChIP                     |
| BWP53R       | GAATGAAAAGTGATATACTGGAATGTT                                    | 7.2kb lambda ChIP                     |
| BWP54F       | GTCATCTGCGAGGCTGTTCT                                           | 7.2kb lambda ChIP                     |
| BWP54R       | TCGATGGAAAACTTTTCTCTTTAC                                       | 7.2kb lambda ChIP                     |
| BWP55F       | CCGACCAGAACACCTTGC                                             | 7.2kb lambda ChIP                     |
| BWP55R       | CCCACAGTACCCAATGATCC                                           | 7.2kb lambda ChIP                     |
| BWP56F       | ATAAAGCACCAACGCCTGAC                                           | 7.2kb lambda ChIP                     |
| BWP56R       | AACACAAGAGCAGCTTGAGGA                                          | 7.2kb lambda ChIP                     |
| BWP57F       | GCGAGATTACAAAGTTACCTGTCA                                       | 7.2kb lambda ChIP                     |
| BWP57R       | TGCACCATTCTGAGATGTTTTT                                         | 7.2kb lambda ChIP                     |
| BWP58F       | GCGATAAGTGGACCCAATC                                            | 7.2kb lambda ChIP                     |
| BWP58R       | CATCTGCTCACGGTCAAAGT                                           | 7.2kb lambda ChIP                     |
| BWP59F       | GCGCACTACTGGCTGGTTAC                                           | 7.2kb lambda ChIP                     |
| BWP59R       | GCCCATGACAGGAAGTTGTT                                           | 7.2kb lambda ChIP                     |
| BWP60F       | TTCGATCTCCAGCACATCAG                                           | 7.2kb lambda ChIP                     |
| BWP60R       | AGGCCCATAGCTTCTGTTT                                            | 7.2kb lambda ChIP                     |
| BWP61F       | CGGTTTGTGAGGGAAGTTGT                                           | 7.2kb lambda ChIP                     |
| BWP61R       | ATGGCTTCAGAACAGGCATT                                           | 7.2kb lambda ChIP                     |
| BWP71F       | TCAGGAAGCGAATTCTAAGGA                                          | <i>spcc330.03<sup>+</sup></i> qRT-PCR |
| BWP71R       | AAAGCATCCCAATCTTGTTGA                                          | <i>spcc330.03<sup>+</sup></i> qRT-PCR |
| BWP74F       | ACTCTGTCTGGATTGGTGGGA                                          | <i>act1<sup>+</sup></i> qRT-PCR       |
| BWP74R       | AACGATACCAGGTCCGCTCT                                           | <i>act1<sup>+</sup></i> qRT-PCR       |
| BWP77F       | GGCTGACAAAAGCGAAAAAG                                           | <i>330.07<sup>+</sup></i> qRT-PCR     |
| BWP77R       | AATGCCACTTCCGCTAAAAA                                           | <i>330.07<sup>+</sup></i> qRT-PCR     |
| BWP84F       | CGGCATCGCTTGTACTTTTT                                           | centromere                            |
| BWP84R       | GACGGAACCAAATGATGTGA                                           | centromere                            |
| BWP85F       | CATGGAAATTGCAGTGATGG                                           | <i>ade6<sup>+</sup></i> qRT-PCR       |
| BWP85R       | CGAGCAGGGGCATATACTAAA                                          | <i>ade6<sup>+</sup></i> qRT-PCR       |
| BWP86F       | TTGATGCCAGACCGTAATGA                                           | <i>ura4</i> locus ChIP                |
| BWP86R       | TCTGACATGGCATTCTCAA                                            | <i>ura4</i> locus ChIP                |
| BWP89F       | CTGCGGTAGCGATATCATCA                                           | iPCR                                  |
| BWP91F       | TAAGGGGAAGGGAAAGGAAA                                           | 5kb IG ChIP                           |

|         |                            |                                            |
|---------|----------------------------|--------------------------------------------|
| BWP91R  | GCTAGCCGTTTCTCATCTCG       | 5kb IG ChIP                                |
| BWP92F  | TTGAACGATGGAAAACAGTGA      | 5kb IG ChIP                                |
| BWP92R  | TTTCAGACTCCCTACCCTTTTT     | 5kb IG ChIP                                |
| BWP93F  | CAAACGATAGCAACTATGTCAGC    | 5kb IG ChIP                                |
| BWP93R  | GCCTGCGAAAACCTTCAATCT      | 5kb IG ChIP                                |
| BWP94F  | AAAAACTGCAAGCACGAGGT       | 5kb IG ChIP                                |
| BWP94R  | AAACGGCCGACAGATTAATA       | 5kb IG ChIP                                |
| BWP95F  | TTGCATCTAATGAATGTTTTTGC    | 5kb IG ChIP                                |
| BWP95R  | TAGGGGGATAAGTGGAAACGA      | 5kb IG ChIP                                |
| BWP96F  | GGATAGGAATTTCCCGGTGT       | 5kb IG ChIP                                |
| BWP96R  | TGCATAGGCCGATGAAAAGT       | 5kb IG ChIP                                |
| BWP98F  | TGCATCATGAGAAAGGGAGA       | <i>ura4</i> locus ChIP                     |
| BWP98R  | GATTTGGGAAAACGGATGTG       | <i>ura4</i> locus ChIP                     |
| BWP99F  | TTTTGAATACGCCGTTACTCC      | <i>ura4</i> locus ChIP                     |
| BWP99R  | GATCCGACAGCAACCATTTT       | <i>ura4</i> locus ChIP                     |
| BWP100F | GGCCTTAGGTAAAAAGCATCG      | <i>ura4</i> locus ChIP                     |
| BWP100R | TGAGCCCAAGAAGCAATTTT       | <i>ura4</i> locus ChIP                     |
| BWP102F | CACAATATCGGTGCAATAGG       | <i>ura4</i> locus ChIP                     |
| BWP102R | TCAGGAGGAATTATTTGGGAAT     | <i>ura4</i> locus ChIP                     |
| BWP103F | AAGATGCATTTCCATTATAATCCTC  | <i>ura4</i> locus ChIP                     |
| BWP103R | TCATTTTTGCTTATCGATCACTG    | <i>ura4</i> locus ChIP                     |
| BWP104F | CGTATATGGGGTTGGCTTGT       | <i>ura4</i> locus ChIP                     |
| BWP104R | CGACAAGGTACAGTTTAGCAATG    | <i>ura4</i> locus ChIP                     |
| BWP107F | TTTATTCAACACAGCCAAGGAA     | <i>ura4</i> locus ChIP                     |
| BWP107R | CATACAAATGAATATTCGACAATGTG | <i>ura4</i> locus ChIP                     |
| BWP108F | TGACCGTAGTCGTAACCTCGAA     | <i>spcc330.19</i> <sup>+</sup> qRT-PCR     |
| BWP108R | AAAGCAAGACAAGCGGTATGA      | <i>spcc330.19</i> <sup>+</sup> qRT-PCR     |
| BWP111F | GCCTGGTGATTCAATCTTCAA      | <i>rhp7</i> <sup>+</sup> qRT-PCR           |
| BWP111R | TTGCCCAAATTTGATTAGCC       | <i>rhp7</i> <sup>+</sup> qRT-PCR           |
| BWP114F | AAACAACCTTGAAAATGAATCAA    | <i>ura4</i> locus ChIP                     |
| BWP114R | AACGAAGTGATGATGTTTTCTTG    | <i>ura4</i> locus ChIP                     |
| BWP118F | ACGCTGAGAGGGAGTTTGAA       | <i>ura4</i> locus ChIP                     |
| BWP118R | CCAACATGCCTGTAAGTAGTTTT    | <i>ura4</i> locus ChIP                     |
| BWP120F | CCCGTATTTCTCAAATAAATCTCA   | <i>ura4</i> locus ChIP                     |
| BWP120R | CACCAAAGCCGATTTATTCC       | <i>ura4</i> locus ChIP                     |
| BWP121F | GCTAGAAAGGAAAGCATTGGAA     | <i>ura4</i> locus ChIP                     |
| BWP121R | TCAAAGCCCTTTTCTTGGA        | <i>ura4</i> locus ChIP                     |
| BWP128F | AGCATCTACAACAAATTTGACTTTT  | <i>alg11</i> <sup>+</sup> qRT-PCR          |
| BWP128R | GCGTTTCGAGGTGAAGAAGAC      | <i>alg11</i> <sup>+</sup> qRT-PCR          |
| BWP135F | AACCAACGACATCATGGGTAG      | L5- <i>ade6</i> <sup>+</sup> junction      |
| BWP135R | CAGGCTGGATTTTCGTTTACC      | L5- <i>ade6</i> <sup>+</sup> junction      |
| BWP159F | GTATTCTGGGCCTCCATGTC       | lambda-Pnmt1 junction                      |
| BWP159R | TGAAACAACCGCTGATGACT       | lambda-Pnmt1 junction                      |
| BWP160F | TTTCAATCTCATTCTCACTTTCTGA  | Pnmt1- <i>his3</i> <sup>+</sup> junction   |
| BWP160R | GCACAGCGATAAGGCTGAAG       | Pnmt1- <i>his3</i> <sup>+</sup> junction   |
| BWP165F | TTACGCACGTTTCATTTCCA       | <i>spbc2f12.03</i> <sup>+</sup> locus ChIP |
| BWP165R | GGCTCATCTAGGTCAAGTTCCG     | <i>spbc2f12.03</i> <sup>+</sup> locus ChIP |
| BWP166F | GATGCCTATTATCCGTGAAGC      | <i>ceg1</i> <sup>+</sup> qRT-PCR           |
| BWP166R | TTGATTGCAGGAGCATCATC       | <i>ceg1</i> <sup>+</sup> qRT-PCR           |
| BWP167F | AACCATCAACACGTTGGTCA       | <i>rpl802</i> <sup>+</sup> qRT-PCR         |
| BWP167R | AAAGACCGTTCTACGAGCA        | <i>rpl802</i> <sup>+</sup> qRT-PCR         |
| BWP168F | CAAATATGCGGGCTCTCAA        | <i>spbc2f12.03</i> <sup>+</sup> locus ChIP |
| BWP168R | TTCGTGGCTCATTCTCATTTT      | <i>spbc2f12.03</i> <sup>+</sup> locus ChIP |
| BWP169F | TGCCCGTGAATTTAAGAAGG       | <i>spbc2f12.03</i> <sup>+</sup> locus ChIP |

|         |                             |                                            |
|---------|-----------------------------|--------------------------------------------|
| BWP169R | TTCATTCAAATCAATAGCATCATT    | <i>spbc2f12.03</i> <sup>+</sup> locus ChIP |
| BWP170F | AACCATGCAAACAAAGCAGA        | <i>spbc2f12.03</i> <sup>+</sup> locus ChIP |
| BWP170R | GAAGGTTGTGGCTTATGTTTCAG     | <i>spbc2f12.03</i> <sup>+</sup> locus ChIP |
| BWP171F | CGATCGTCCGAAAATCAGTC        | <i>spbc2f12.05</i> <sup>+</sup> qRT-PCR    |
| BWP171R | TTCATTGAAGCTTACTGGCAAA      | <i>spbc2f12.05</i> <sup>+</sup> qRT-PCR    |
| BWP172F | TTTGCAAAAAGGCAAGGAAT        | <i>spbc2f12.03</i> <sup>+</sup> locus ChIP |
| BWP172R | TAAATAAACTTTACTCAGTGTTGTTGG | <i>spbc2f12.03</i> <sup>+</sup> locus ChIP |
| BWP173F | CTGAATAGCGGACCATTGCT        | <i>spbc2f12.03</i> <sup>+</sup> locus ChIP |
| BWP173R | AAGTGTCCAAACCAGTCACAA       | <i>spbc2f12.03</i> <sup>+</sup> locus ChIP |
| BWP174F | CAAGGCTTGCTGCTCTTTTT        | <i>spbc2f12.03</i> <sup>+</sup> locus ChIP |
| BWP174R | GGATGATGGAGAGCCTGAAA        | <i>spbc2f12.03</i> <sup>+</sup> locus ChIP |
| BWP175F | TGCCAATGCTTCTACCTTTG        | <i>spbc2f12.03</i> <sup>+</sup> locus ChIP |
| BWP175R | TCTGTGAAAGTCCAGTTCGAATA     | <i>spbc2f12.03</i> <sup>+</sup> locus ChIP |
| BWP176F | TTGTTTACATAGGACTGCGTTGA     | <i>spbc2f12.03</i> <sup>+</sup> locus ChIP |
| BWP176R | AATCAATTGGCAAGCTGAGG        | <i>spbc2f12.03</i> <sup>+</sup> locus ChIP |
| BWP177F | CGGATTTCTTACTTGGCACT        | <i>spbc2f12.03</i> <sup>+</sup> locus ChIP |
| BWP177R | GGATCTTAGGTACTAGGGCTGGA     | <i>spbc2f12.03</i> <sup>+</sup> locus ChIP |
| BWP178F | CATGCCTTTATTTCCCAAA         | <i>mrpl7</i> <sup>+</sup> qRT-PCR          |
| BWP178R | CCAAACGGGTATCTTTGGAA        | <i>mrpl7</i> <sup>+</sup> qRT-PCR          |
| BWP179F | AAATGATGGGGATGAACCAG        | <i>byr2</i> <sup>+</sup> qRT-PCR           |
| BWP179R | CCAACGGAAATGAAAAATCG        | <i>byr2</i> <sup>+</sup> qRT-PCR           |
| BWP180F | TCCATAAATGCAGGAAAGTGG       | <i>spbc2f12.03</i> <sup>+</sup> locus ChIP |
| BWP180R | CGAGACTAAGGGAGGCAGGT        | <i>spbc2f12.03</i> <sup>+</sup> locus ChIP |
| BWP181F | TGGTTCAGCTCACTTCTCCA        | <i>spbc2f12.03</i> <sup>+</sup> locus ChIP |
| BWP181R | TTGGCAATATAATGCTGTTTCG      | <i>spbc2f12.03</i> <sup>+</sup> locus ChIP |

---
